# Supplementary material
Source: PubMed Central journal article supplement (PMC3993409)
Supplement: IAI.01388-13_zii999090604so1.pdf [file IAI.01388-13_zii999090604so1.pdf]

TABLE S1. PCR primers and nucleotide sequence used in this study

| Gene                             | Amplicon size (bp) | Sequences of primers                                                                                                   |
|----------------------------------|--------------------|------------------------------------------------------------------------------------------------------------------------|
| PrtR (promoter1)                 | 1033               | PprtR-A1: CAGGAGGAATTTCGAGGCGAGCCAGGACCAGTT<br>PprtR-B: GGTGGAGGATCCCATGATCAGCGGTTCCATGC                               |
| PrtR (promoter2)                 | 593                | PprtR-A2: ACCCCTGAATTCTTCTGACGGAAGAGAAATTA                                                                             |
| PrtR (promoter3)                 | 560                | PprtR-A3: AACCAAGAATTCTTATCGTCAACACCTAGGCT                                                                             |
| <i>prtR-1-his</i>                | 1305               | prtR-A1: CAGGAGGAGCTCGAGGCGAGCCAGGACCAGTT<br>prtR-his: ATTATAAAGCTTTCAGTGGTGGTGGTGGTGGTGA<br>CCTCCCCGCACCAGGGACGGGCCGC |
| <i>prtR-2-his</i>                | 890                | prtR-A2: ACCCCTGAGCTCTTCTGACGGAAGAGAAATTA                                                                              |
| <i>prtR-3-his</i>                | 857                | prtR-A3: AACCAAGAGCTCTTATCGTCAACACCTAGGCT                                                                              |
| <i>prtN</i> (Q-PCR) <sup>a</sup> | 62                 | PA0610-A: GCCCTGCCGGTGACAAC<br>PA0610-B: TGATCGAGGGCCACGAA                                                             |
| <i>prtR</i> (Q-PCR)              | 76                 | PA0611-A: CCACCCATATCACCGATG<br>PA0611-B: AGGCGATAGACGAACTTC                                                           |
| <i>ptrB</i> (Q-PCR)              | 101                | PA0612-A: GATCACGCCAACGAACTGGTC<br>PA0612-B: CCGCAGTCCTCGCAGTCTTCC                                                     |
| PA0613(Q-PCR)                    | 62                 | PA0613-A: GTGGTGGTGGAGCACTATCTCA<br>PA0613-B: CCGCAGTGGCGGTACTTC                                                       |
| PA0614(Q-PCR)                    | 73                 | PA0614-A: CGCTGCCTGCCAAGGA<br>PA0614-B: ATCAGTACCCAGAGCGGCATT                                                          |
| <i>exoS</i> (Q-PCR)              | 83                 | PA3841-A: GCATATTCAATCGCTTCAG<br>PA3841-B: CCTCAATCTGTCCCAAAC                                                          |
| <i>pcrV</i> (Q-PCR)              | 62                 | PA1706-A: CACGCTATATGGCTATGC<br>PA1706-B: GGTATCCAGATTGCTCAG                                                           |
| <i>pscC</i> (Q-PCR)              | 75                 | PA1716-A: GTTGATGGCCTCCCTCTA<br>PA1716-B: ATCTCGGTGGTCTTGAATAC                                                         |
| <i>exsC</i> (Q-PCR)              | 75                 | PA1710-A: GATTTAACGAGCAAGGTCAACC<br>PA1710-B: GTCGAGGGACAGGGAAGG                                                       |
| Binding1(EMSA)                   | 40                 | CGGAAGAGAAATTACAACCAAAGCTATTTATCGTCAACAC                                                                               |
| Binding2(EMSA)                   | 40                 | GTGTTGACGATAAATAGCTTTGGTTGTAATTTCTCTTCCG                                                                               |
| Nbinding1(EMSA)                  | 40                 | CGGAAGAGAAATTGTCGTCAACTTCCGTTATCGTCAACAC                                                                               |
| Nbinding2(EMSA)                  | 40                 | GTGTTGACGATAACGGAAGTTGACGACAATTTCTCTTCCG                                                                               |

<sup>a</sup> Q-PCR, quantitative real-time PCR; EMSA, electrophoretic mobility shift assay.
